# Supplementary material for: Seasonal Filarial Infections and Their Black Fly Vectors in Chiang Mai Province, Northern Thailand
Source: PubMed Central journal article supplement (PMC7350311; doi:10.3390/pathogens9060512), 2020-06-25
Supplement: pathogens-09-00512-s001.pdf [file pathogens-09-00512-s001.pdf]

**Table S1.** NCBI BLAST results of filarial and non-filarial nematodes recovered from *Simulium* spp. based on mitochondrial *cox1*, 12S rRNA and nuclear 18S rRNA (*SSU* HVR-I) gene sequences.

| Black fly species                | Specimen Isolate                                                             | Gene        | Closest species                   | % similarity | GenBank accession number     |
|----------------------------------|------------------------------------------------------------------------------|-------------|-----------------------------------|--------------|------------------------------|
| <i>S. sp.</i>                    | BPD1                                                                         | <i>Cox1</i> | <i>Dirofilaria repens</i>         | 90           | MH780816                     |
|                                  |                                                                              |             | <i>Loa loa</i>                    |              | HQ186250                     |
|                                  |                                                                              |             | <i>Onchocerca gibsoni</i>         |              | AJ271616                     |
|                                  |                                                                              | 12S rRNA    | <i>Wuchereria bancrafti</i>       | 89           | JF775522                     |
|                                  |                                                                              |             | <i>Brugia malayi</i>              |              | AF538716                     |
|                                  |                                                                              |             | <i>Loa loa</i>                    |              | HQ186250                     |
| <i>S. asakoeae</i> species-group | BPD2, BPD3, BPD4.1, BPD4.2                                                   | <i>Cox1</i> | <i>Dirofilaria repens</i>         | 90           | MH780816                     |
|                                  |                                                                              |             | <i>Loa loa</i>                    |              | HQ186250                     |
|                                  |                                                                              |             | <i>Onchocerca gibsoni</i>         |              | AJ271616                     |
|                                  |                                                                              | 12S rRNA    | <i>Wuchereria bancrafti</i>       | 88-90        | JF775522                     |
|                                  |                                                                              |             | <i>Brugia malayi</i>              |              | AF538716                     |
|                                  |                                                                              |             | <i>Loa loa</i>                    |              | HQ186250, AJ544845, FR827907 |
|                                  | BPD5                                                                         | 18S rRNA    | <i>Isomermis lairdi</i>           | 98           | FN400900                     |
|                                  | BPD6                                                                         | 12S rRNA    | <i>Litoditis aff. Marina PmlV</i> | 91           | KR815453                     |
|                                  | BPD8                                                                         | 18S rRNA    | <i>Porrocaecum streperae</i>      | 98           | EF180074                     |
|                                  |                                                                              |             | <i>Pseudoterranova decipiens</i>  |              | U94380                       |
|                                  |                                                                              |             | <i>Baylisascaris procyonis</i>    |              | U94368                       |
| <i>Ascaris suum</i>              |                                                                              |             | U94367                            |              |                              |
| <i>S. nigrogilvum</i>            | BL1, BL2, BL3.1, BL3.2, BL4.1, BL4.2, BL5.1, BL5.2, BL5.3, BL5.4, BL5.5, BL6 | <i>Cox1</i> | <i>Onchocerca</i> sp. type A      | 99-100       | AB518876                     |
|                                  |                                                                              | 12S rRNA    |                                   | 100          | AB518877, AB518878, AB518879 |

**Table S2.** Range of interspecific genetic divergence (%) among the infected black flies belonging to *S. asakoe* species-group.

|           | <b>Black fly species</b> | <b>1</b>  | <b>2</b>  | <b>3</b>  | <b>4</b>  | <b>5</b>  | <b>6</b>  | <b>7</b>  | <b>8</b>  | <b>9</b>  | <b>10</b> | <b>11</b> | <b>12</b> | <b>13</b> | <b>14</b> | <b>15</b> | <b>16</b> | <b>17</b> | <b>18</b> | <b>19</b> |
|-----------|--------------------------|-----------|-----------|-----------|-----------|-----------|-----------|-----------|-----------|-----------|-----------|-----------|-----------|-----------|-----------|-----------|-----------|-----------|-----------|-----------|
| <b>1</b>  | <i>S. sp. BPD2</i>       |           |           |           |           |           |           |           |           |           |           |           |           |           |           |           |           |           |           |           |
| <b>2</b>  | <i>S. sp. BPD3</i>       | 8.93      |           |           |           |           |           |           |           |           |           |           |           |           |           |           |           |           |           |           |
| <b>3</b>  | <i>S. sp. BPD4</i>       | 8.53      | 2.73      |           |           |           |           |           |           |           |           |           |           |           |           |           |           |           |           |           |
| <b>4</b>  | <i>S. sp. BPD5</i>       | 9.15      | 2.92      | 1.62      |           |           |           |           |           |           |           |           |           |           |           |           |           |           |           |           |
| <b>5</b>  | <i>S. sp. BPD6</i>       | 0.54      | 8.73      | 8.33      | 8.95      |           |           |           |           |           |           |           |           |           |           |           |           |           |           |           |
| <b>6</b>  | <i>S. sp. BPD7</i>       | 7.75      | 4.42      | 4.43      | 3.28      | 7.76      |           |           |           |           |           |           |           |           |           |           |           |           |           |           |
| <b>7</b>  | <i>S. sp. BPD8</i>       | 7.53      | 6.74      | 6.15      | 5.95      | 7.75      | 5.55      |           |           |           |           |           |           |           |           |           |           |           |           |           |
| <b>8</b>  | <i>S. sp. BPD9</i>       | 7.53      | 6.74      | 6.15      | 5.95      | 7.75      | 5.55      | 0         |           |           |           |           |           |           |           |           |           |           |           |           |
| <b>9</b>  | <i>S. asakoe</i>         | 0.00-2.17 | 8.32-8.93 | 7.92-8.53 | 8.13-9.15 | 0.54-1.99 | 6.95-7.75 | 7.34-7.53 | 7.34-7.53 |           |           |           |           |           |           |           |           |           |           |           |
| <b>10</b> | <i>S. monglaense</i>     | 8.52-8.73 | 2.92-3.48 | 0.18-2.17 | 1.62-1.81 | 8.54-8.73 | 4.23-4.62 | 6.14-6.35 | 6.14-6.35 | 7.91-8.73 |           |           |           |           |           |           |           |           |           |           |
| <b>11</b> | <i>S. myanmarensis</i>   | 8.93-9.14 | 0.00-0.18 | 2.73-2.92 | 2.92-3.11 | 8.73-8.94 | 4.42-4.61 | 6.74-6.94 | 6.74-6.94 | 8.32-9.14 | 2.92-3.67 |           |           |           |           |           |           |           |           |           |
| <b>12</b> | <i>S. lurauense</i>      | 9.15-9.56 | 8.49-8.90 | 8.70-9.11 | 7.69-8.09 | 9.34-9.76 | 6.71-7.11 | 7.92-8.33 | 7.92-8.33 | 8.52-9.56 | 7.88-9.32 | 8.49-9.10 |           |           |           |           |           |           |           |           |
| <b>13</b> | <i>S. softiani</i>       | 9.35      | 8.49      | 8.7       | 8.09      | 9.55      | 7.11      | 8.33      | 8.33      | 8.72-9.35 | 7.88-8.90 | 8.49-8.69 | 0.36-0.54 |           |           |           |           |           |           |           |
| <b>14</b> | <i>S. udomi</i>          | 8.37      | 6.75      | 6.36      | 6.56      | 8.18      | 7.76      | 6.79      | 6.79      | 7.36-8.37 | 6.56-7.36 | 6.75-6.96 | 8.52      | 8.93      |           |           |           |           |           |           |
| <b>15</b> | <i>S. rampae</i>         | 8.38-8.59 | 6.56-6.76 | 5.78-5.97 | 5.97-6.17 | 8.19-8.40 | 7.36-7.56 | 6.60-6.40 | 6.60-6.40 | 7.37-8.59 | 6.97-6.96 | 6.56-6.96 | 7.91-8.12 | 8.32-8.53 | 0.71-0.89 |           |           |           |           |           |
| <b>16</b> | <i>S. brinhangense</i>   | 7.36      | 7.53-7.74 | 6.74-6.94 | 6.54-6.74 | 7.57      | 5.57-5.76 | 2.35-2.73 | 2.35-2.73 | 7.17-7.57 | 6.73-7.14 | 7.53-7.94 | 7.54-7.95 | 7.95      | 7.39      | 7.20-7.40 |           |           |           |           |
| <b>17</b> | <i>S. tanahrataense</i>  | 7.95      | 4.61      | 4.62      | 3.47      | 7.96      | 0.18      | 5.74      | 5.74      | 7.15-7.95 | 4.42-4.81 | 4.61-4.81 | 6.91-7.31 | 7.31      | 7.96      | 7.56-7.77 | 5.76-5.96 |           |           |           |
| <b>18</b> | <i>S. izuae</i>          | 9.35      | 3.30-3.49 | 2.36-2.93 | 2.18-2.36 | 9.16      | 4.23-4.43 | 5.95-6.15 | 5.95-6.15 | 7.52-9.35 | 2.55-3.68 | 3.30-3.68 | 8.49-9.11 | 8.90-9.11 | 6.76-6.96 | 6.57-6.97 | 6.34-6.74 | 4.43-4.62 |           |           |
| <b>19</b> | <i>S. roslitashimi</i>   | 8.95-9.16 | 3.29-3.67 | 2.36      | 1.81      | 8.75-8.96 | 4.61-4.81 | 5.76-6.16 | 5.76-6.16 | 7.12-9.16 | 2.55-3.10 | 3.29-3.86 | 8.30-8.91 | 8.71-8.91 | 6.57-6.97 | 6.38-6.58 | 6.15-6.55 | 4.81-5.00 | 1.62-2.17 |           |
